# Supplementary material
Source: publisher figshare collection journal article supplement (https://acs.figshare.com/ndownloader/files/4106341)
Supplement: Supplementary file 1 [file 4106341]

 
data_nnddioxane_0m 
 
_audit_creation_method            SHELXL-97 
_chemical_name_systematic 
; 
 ? 
; 
_chemical_name_common             ? 
_chemical_melting_point           ? 
_chemical_formula_moiety          ? 
_chemical_formula_sum 
 'C29 H37 N O5' 
_chemical_formula_weight          479.60 
 
loop_ 
 _atom_type_symbol 
 _atom_type_description 
 _atom_type_scat_dispersion_real 
 _atom_type_scat_dispersion_imag 
 _atom_type_scat_source 
 'C'  'C'   0.0033   0.0016 
 'International Tables Vol C Tables 4.2.6.8 and 6.1.1.4' 
 'H'  'H'   0.0000   0.0000 
 'International Tables Vol C Tables 4.2.6.8 and 6.1.1.4' 
 'N'  'N'   0.0061   0.0033 
 'International Tables Vol C Tables 4.2.6.8 and 6.1.1.4' 
 'O'  'O'   0.0106   0.0060 
 'International Tables Vol C Tables 4.2.6.8 and 6.1.1.4' 
 
_symmetry_cell_setting           'Triclinic'
_symmetry_space_group_name_H-M   'P-1   ' 
 
loop_ 
 _symmetry_equiv_pos_as_xyz 
 'x, y, z' 
 '-x, -y, -z' 
 
_cell_length_a                    9.8237(11) 
_cell_length_b                    11.8361(13) 
_cell_length_c                    13.2385(14) 
_cell_angle_alpha                 68.077(4) 
_cell_angle_beta                  88.819(4) 
_cell_angle_gamma                 68.848(4) 
_cell_volume                      1320.1(2) 
_cell_formula_units_Z             2 
_cell_measurement_temperature     296(2) 
_cell_measurement_reflns_used     ? 
_cell_measurement_theta_min       ? 
_cell_measurement_theta_max       ? 
 
_exptl_crystal_description        block 
_exptl_crystal_colour             red 
_exptl_crystal_size_max           0.33
_exptl_crystal_size_mid           0.24
_exptl_crystal_size_min           0.16 
_exptl_crystal_density_meas       ? 
_exptl_crystal_density_diffrn     1.207 
_exptl_crystal_density_method     'not measured' 
_exptl_crystal_F_000              516 
_exptl_absorpt_coefficient_mu     0.082 
_exptl_absorpt_correction_type    none 
_exptl_absorpt_correction_T_min   ? 
_exptl_absorpt_correction_T_max   ? 
_exptl_absorpt_process_details    ? 
 
_exptl_special_details 
; 
 ? 
; 
 
_diffrn_ambient_temperature       296(2) 
_diffrn_radiation_wavelength      0.71073 
_diffrn_radiation_type            MoK\a 
_diffrn_radiation_source          'fine-focus sealed tube' 
_diffrn_radiation_monochromator   graphite 
_diffrn_measurement_device_type  'CCD area detector'
_diffrn_measurement_method       'phi and omega scans' 
_diffrn_detector_area_resol_mean  ? 
_diffrn_standards_number          ? 
_diffrn_standards_interval_count  ? 
_diffrn_standards_interval_time   ? 
_diffrn_standards_decay_%         ? 
_diffrn_reflns_number             13340 
_diffrn_reflns_av_R_equivalents   0.0511 
_diffrn_reflns_av_sigmaI/netI     0.1013 
_diffrn_reflns_limit_h_min        -11 
_diffrn_reflns_limit_h_max        11 
_diffrn_reflns_limit_k_min        -14 
_diffrn_reflns_limit_k_max        11 
_diffrn_reflns_limit_l_min        -15 
_diffrn_reflns_limit_l_max        15 
_diffrn_reflns_theta_min          1.67 
_diffrn_reflns_theta_max          25.24 
_reflns_number_total              4704 
_reflns_number_gt                 2031 
_reflns_threshold_expression      >2sigma(I) 
 
_computing_data_collection      'Bruker SMART'
_computing_cell_refinement      'Bruker SMART'
_computing_data_reduction       'Bruker SAINT' 
_computing_structure_solution     'SHELXS-97 (Sheldrick, 1990)' 
_computing_structure_refinement   'SHELXL-97 (Sheldrick, 1997)' 
_computing_molecular_graphics   'Bruker SHELXTL'
_computing_publication_material 'Bruker SHELXTL' 
 
_refine_special_details 
; 
 Refinement of F^2^ against ALL reflections.  The weighted R-factor wR and 
 goodness of fit S are based on F^2^, conventional R-factors R are based 
 on F, with F set to zero for negative F^2^. The threshold expression of 
 F^2^ > 2sigma(F^2^) is used only for calculating R-factors(gt) etc. and is 
 not relevant to the choice of reflections for refinement.  R-factors based 
 on F^2^ are statistically about twice as large as those based on F, and R- 
 factors based on ALL data will be even larger. 
; 
 
_refine_ls_structure_factor_coef  Fsqd  
_refine_ls_matrix_type            full 
_refine_ls_weighting_scheme       calc  
_refine_ls_weighting_details 
 'calc w=1/[\s^2^(Fo^2^)+(0.0010P)^2^+2.7930P] where P=(Fo^2^+2Fc^2^)/3' 
_atom_sites_solution_primary      direct 
_atom_sites_solution_secondary    difmap 
_atom_sites_solution_hydrogens    geom 
_refine_ls_hydrogen_treatment     constr
_refine_ls_extinction_method      none 
_refine_ls_extinction_coef        ? 
_refine_ls_number_reflns          4704
_refine_ls_number_parameters      324 
_refine_ls_number_restraints      0 
_refine_ls_R_factor_all           0.1827 
_refine_ls_R_factor_gt            0.0757 
_refine_ls_wR_factor_ref          0.1798 
_refine_ls_wR_factor_gt           0.1386 
_refine_ls_goodness_of_fit_ref    1.040 
_refine_ls_restrained_S_all       1.040 
_refine_ls_shift/su_max           0.000 
_refine_ls_shift/su_mean          0.000 
 
loop_ 
 _atom_site_label 
 _atom_site_type_symbol 
 _atom_site_fract_x 
 _atom_site_fract_y 
 _atom_site_fract_z 
 _atom_site_U_iso_or_equiv 
 _atom_site_adp_type 
 _atom_site_occupancy 
 _atom_site_symmetry_multiplicity 
 _atom_site_calc_flag 
 _atom_site_refinement_flags 
 _atom_site_disorder_assembly 
 _atom_site_disorder_group 
C4 C 0.6618(5) 0.8525(4) 0.3256(3) 0.0428(11) Uani 1 1 d . . . 
C2 C 0.4219(5) 0.8440(4) 0.2981(4) 0.0457(12) Uani 1 1 d . . . 
C6 C 0.5865(5) 0.8356(5) 0.1596(4) 0.0525(13) Uani 1 1 d . . . 
C3 C 0.5284(5) 0.8508(4) 0.3615(4) 0.0450(12) Uani 1 1 d . . . 
H3 H 0.5094 0.8544 0.4296 0.054 Uiso 1 1 calc R . . 
C1 C 0.4540(5) 0.8370(4) 0.1983(4) 0.0504(12) Uani 1 1 d . . . 
C5 C 0.6883(5) 0.8442(4) 0.2253(4) 0.0499(12) Uani 1 1 d . . . 
H5 H 0.7776 0.8443 0.2005 0.060 Uiso 1 1 calc R . . 
C8 C 0.2781(5) 0.8432(5) 0.3398(4) 0.0641(15) Uani 1 1 d . . . 
H8A H 0.1979 0.9164 0.2886 0.096 Uiso 1 1 calc R . . 
H8B H 0.2761 0.8502 0.4098 0.096 Uiso 1 1 calc R . . 
H8C H 0.2686 0.7625 0.3477 0.096 Uiso 1 1 calc R . . 
C7 C 0.6217(6) 0.8216(6) 0.0519(4) 0.0862(19) Uani 1 1 d . . . 
H7A H 0.6578 0.7302 0.0635 0.129 Uiso 1 1 calc R . . 
H7B H 0.6953 0.8567 0.0245 0.129 Uiso 1 1 calc R . . 
H7C H 0.5341 0.8690 -0.0005 0.129 Uiso 1 1 calc R . . 
C9 C 0.7754(4) 0.8648(4) 0.3943(3) 0.0418(11) Uani 1 1 d . . . 
H9 H 0.8698 0.8328 0.3678 0.050 Uiso 1 1 calc R . . 
C18 C 0.7952(4) 0.7734(4) 0.5151(4) 0.0418(11) Uani 1 1 d . . . 
C19 C 0.8313(5) 0.6393(4) 0.5434(4) 0.0476(12) Uani 1 1 d . . . 
H19 H 0.8429 0.6084 0.4874 0.057 Uiso 1 1 calc R . . 
C22 C 0.7996(5) 0.7297(5) 0.7104(4) 0.0534(13) Uani 1 1 d . . . 
C21 C 0.8330(5) 0.5979(5) 0.7324(4) 0.0541(13) Uani 1 1 d . . . 
C20 C 0.8507(5) 0.5503(5) 0.6499(4) 0.0515(13) Uani 1 1 d . . . 
C23 C 0.7811(5) 0.8159(4) 0.6009(4) 0.0475(12) Uani 1 1 d . . . 
H23 H 0.7586 0.9046 0.5849 0.057 Uiso 1 1 calc R . . 
C25 C 0.8911(6) 0.4050(5) 0.6780(4) 0.0720(16) Uani 1 1 d . . . 
H25A H 0.9880 0.3562 0.7187 0.108 Uiso 1 1 calc R . . 
H25B H 0.8896 0.3903 0.6115 0.108 Uiso 1 1 calc R . . 
H25C H 0.8214 0.3764 0.7216 0.108 Uiso 1 1 calc R . . 
C24 C 0.7815(7) 0.7820(6) 0.8004(4) 0.092(2) Uani 1 1 d . . . 
H24A H 0.7107 0.7567 0.8448 0.138 Uiso 1 1 calc R . . 
H24B H 0.7480 0.8763 0.7681 0.138 Uiso 1 1 calc R . . 
H24C H 0.8744 0.7461 0.8454 0.138 Uiso 1 1 calc R . . 
C10 C 0.7450(4) 1.0069(4) 0.3759(3) 0.0403(11) Uani 1 1 d . . . 
C13 C 0.6969(5) 1.2671(5) 0.3544(4) 0.0496(12) Uani 1 1 d . . . 
C14 C 0.8383(5) 1.1754(5) 0.3635(4) 0.0542(13) Uani 1 1 d . . . 
H14 H 0.9189 1.1994 0.3622 0.065 Uiso 1 1 calc R . . 
C11 C 0.6053(5) 1.0997(4) 0.3660(4) 0.0493(12) Uani 1 1 d . . . 
H11 H 0.5251 1.0754 0.3666 0.059 Uiso 1 1 calc R . . 
C12 C 0.5797(5) 1.2262(4) 0.3554(4) 0.0508(13) Uani 1 1 d . . . 
H12 H 0.4837 1.2849 0.3489 0.061 Uiso 1 1 calc R . . 
C15 C 0.8599(5) 1.0487(5) 0.3745(4) 0.0519(13) Uani 1 1 d . . . 
H15 H 0.9556 0.9893 0.3813 0.062 Uiso 1 1 calc R . . 
C16 C 0.5272(7) 1.4802(5) 0.3510(6) 0.099(2) Uani 1 1 d . . . 
H16A H 0.4631 1.5060 0.2858 0.149 Uiso 1 1 calc R . . 
H16B H 0.5328 1.5570 0.3565 0.149 Uiso 1 1 calc R . . 
H16C H 0.4891 1.4352 0.4142 0.149 Uiso 1 1 calc R . . 
C17 C 0.7897(7) 1.4382(6) 0.3406(6) 0.098(2) Uani 1 1 d . . . 
H17A H 0.8573 1.3854 0.4072 0.147 Uiso 1 1 calc R . . 
H17B H 0.7516 1.5287 0.3320 0.147 Uiso 1 1 calc R . . 
H17C H 0.8400 1.4301 0.2792 0.147 Uiso 1 1 calc R . . 
O1 O 0.3542(4) 0.8278(4) 0.1308(3) 0.0759(11) Uani 1 1 d . . . 
H1 H 0.2699 0.8668 0.1395 0.114 Uiso 1 1 calc R . . 
O2 O 0.8534(5) 0.5070(4) 0.8398(3) 0.0894(13) Uani 1 1 d . . . 
H2 H 0.7733 0.5082 0.8590 0.134 Uiso 1 1 calc R . . 
N1 N 0.6711(5) 1.3942(4) 0.3457(4) 0.0725(13) Uani 1 1 d . . . 
O3 O 1.0370(4) 0.9107(4) 0.1110(3) 0.0840(12) Uani 1 1 d . . . 
C26 C 0.9382(7) 1.0461(6) 0.0790(5) 0.0864(19) Uani 1 1 d . . . 
H26A H 0.9469 1.0754 0.1370 0.104 Uiso 1 1 calc R . . 
H26B H 0.8376 1.0531 0.0687 0.104 Uiso 1 1 calc R . . 
C27 C 1.0276(7) 0.8678(6) 0.0247(5) 0.0887(19) Uani 1 1 d . . . 
H27A H 0.9292 0.8703 0.0131 0.106 Uiso 1 1 calc R . . 
H27B H 1.0966 0.7776 0.0454 0.106 Uiso 1 1 calc R . . 
O4 O 0.6049(8) 0.5541(8) -0.0330(6) 0.154(2) Uani 1 1 d . . . 
C28 C 0.6340(10) 0.4411(11) 0.0615(6) 0.149(4) Uani 1 1 d . . . 
H28A H 0.6084 0.4655 0.1236 0.179 Uiso 1 1 calc R . . 
H28B H 0.7385 0.3877 0.0748 0.179 Uiso 1 1 calc R . . 
C29 C 0.4475(13) 0.6356(9) -0.0529(7) 0.145(3) Uani 1 1 d . . . 
H29A H 0.4196 0.6639 0.0071 0.173 Uiso 1 1 calc R . . 
H29B H 0.4256 0.7134 -0.1203 0.173 Uiso 1 1 calc R . . 
O5 O 0.902(2) 0.509(3) 0.042(2) 0.726(17) Uani 1 1 d . . . 
 
loop_ 
 _atom_site_aniso_label 
 _atom_site_aniso_U_11 
 _atom_site_aniso_U_22 
 _atom_site_aniso_U_33 
 _atom_site_aniso_U_23 
 _atom_site_aniso_U_13 
 _atom_site_aniso_U_12 
C4 0.044(3) 0.040(3) 0.041(3) -0.015(2) 0.009(2) -0.013(2) 
C2 0.047(3) 0.043(3) 0.044(3) -0.015(2) 0.009(2) -0.016(2) 
C6 0.061(3) 0.059(3) 0.038(3) -0.022(3) 0.009(2) -0.021(3) 
C3 0.049(3) 0.043(3) 0.040(3) -0.016(2) 0.012(2) -0.016(2) 
C1 0.054(3) 0.049(3) 0.045(3) -0.018(2) 0.001(2) -0.017(2) 
C5 0.046(3) 0.050(3) 0.046(3) -0.016(2) 0.014(2) -0.014(2) 
C8 0.058(3) 0.078(4) 0.066(4) -0.033(3) 0.015(3) -0.033(3) 
C7 0.085(4) 0.127(6) 0.061(4) -0.054(4) 0.022(3) -0.040(4) 
C9 0.035(2) 0.042(3) 0.046(3) -0.019(2) 0.010(2) -0.011(2) 
C18 0.033(2) 0.039(3) 0.049(3) -0.013(2) 0.006(2) -0.013(2) 
C19 0.045(3) 0.046(3) 0.053(3) -0.021(3) 0.010(2) -0.017(2) 
C22 0.066(3) 0.049(4) 0.043(3) -0.019(3) 0.005(2) -0.018(3) 
C21 0.057(3) 0.048(3) 0.042(3) -0.003(3) 0.003(2) -0.019(2) 
C20 0.041(3) 0.046(3) 0.056(3) -0.014(3) 0.008(2) -0.010(2) 
C23 0.045(3) 0.041(3) 0.052(3) -0.016(3) 0.006(2) -0.015(2) 
C25 0.080(4) 0.046(4) 0.074(4) -0.014(3) 0.012(3) -0.017(3) 
C24 0.139(6) 0.082(5) 0.057(4) -0.031(3) 0.011(4) -0.039(4) 
C10 0.036(2) 0.041(3) 0.041(3) -0.013(2) 0.0095(19) -0.013(2) 
C13 0.050(3) 0.042(3) 0.055(3) -0.014(2) 0.006(2) -0.020(2) 
C14 0.038(3) 0.057(4) 0.066(3) -0.019(3) 0.006(2) -0.023(2) 
C11 0.038(3) 0.046(3) 0.064(3) -0.022(3) 0.011(2) -0.017(2) 
C12 0.034(3) 0.042(3) 0.070(3) -0.018(3) 0.007(2) -0.012(2) 
C15 0.038(3) 0.051(3) 0.058(3) -0.016(3) 0.011(2) -0.014(2) 
C16 0.089(5) 0.058(4) 0.155(6) -0.052(4) 0.032(4) -0.024(4) 
C17 0.084(5) 0.073(5) 0.154(6) -0.050(4) 0.012(4) -0.043(4) 
O1 0.065(2) 0.107(3) 0.066(2) -0.048(2) 0.003(2) -0.030(2) 
O2 0.127(4) 0.066(3) 0.053(2) -0.004(2) 0.006(2) -0.031(3) 
N1 0.055(3) 0.053(3) 0.109(4) -0.029(3) 0.010(3) -0.023(2) 
O3 0.084(3) 0.089(3) 0.058(3) -0.011(2) 0.003(2) -0.028(2) 
C26 0.083(4) 0.094(5) 0.069(4) -0.025(4) 0.007(3) -0.025(4) 
C27 0.102(5) 0.090(5) 0.073(4) -0.020(4) 0.011(4) -0.047(4) 
O4 0.149(6) 0.164(6) 0.169(6) -0.060(5) 0.064(5) -0.088(5) 
C28 0.131(7) 0.195(10) 0.089(6) 0.004(7) -0.004(5) -0.090(7) 
C29 0.158(10) 0.124(8) 0.146(8) -0.041(6) 0.017(7) -0.059(8) 
O5 0.47(3) 0.86(4) 0.75(4) -0.29(3) 0.26(3) -0.18(3) 
 
_geom_special_details 
; 
 All esds (except the esd in the dihedral angle between two l.s. planes) 
 are estimated using the full covariance matrix.  The cell esds are taken 
 into account individually in the estimation of esds in distances, angles 
 and torsion angles; correlations between esds in cell parameters are only 
 used when they are defined by crystal symmetry.  An approximate (isotropic) 
 treatment of cell esds is used for estimating esds involving l.s. planes. 
; 
 
loop_ 
 _geom_bond_atom_site_label_1 
 _geom_bond_atom_site_label_2 
 _geom_bond_distance 
 _geom_bond_site_symmetry_2 
 _geom_bond_publ_flag 
C4 C5 1.380(6) . ? 
C4 C3 1.390(6) . ? 
C4 C9 1.534(6) . ? 
C2 C1 1.378(6) . ? 
C2 C3 1.398(6) . ? 
C2 C8 1.509(6) . ? 
C6 C1 1.385(6) . ? 
C6 C5 1.393(6) . ? 
C6 C7 1.514(6) . ? 
C1 O1 1.399(5) . ? 
C9 C10 1.520(6) . ? 
C9 C18 1.528(6) . ? 
C18 C23 1.390(6) . ? 
C18 C19 1.393(6) . ? 
C19 C20 1.376(6) . ? 
C22 C21 1.386(6) . ? 
C22 C23 1.395(6) . ? 
C22 C24 1.516(6) . ? 
C21 C20 1.387(6) . ? 
C21 O2 1.390(5) . ? 
C20 C25 1.512(6) . ? 
C10 C15 1.384(6) . ? 
C10 C11 1.386(5) . ? 
C13 N1 1.392(6) . ? 
C13 C14 1.395(6) . ? 
C13 C12 1.399(6) . ? 
C14 C15 1.387(6) . ? 
C11 C12 1.378(6) . ? 
C16 N1 1.432(6) . ? 
C17 N1 1.429(6) . ? 
O3 C27 1.430(6) . ? 
O3 C26 1.441(6) . ? 
C26 C27 1.490(7) 2_775 ? 
C27 C26 1.490(7) 2_775 ? 
O4 C28 1.388(8) . ? 
O4 C29 1.463(9) . ? 
C28 C29 1.443(10) 2_665 ? 
C29 C28 1.443(10) 2_665 ? 
 
loop_ 
 _geom_angle_atom_site_label_1 
 _geom_angle_atom_site_label_2 
 _geom_angle_atom_site_label_3 
 _geom_angle 
 _geom_angle_site_symmetry_1 
 _geom_angle_site_symmetry_3 
 _geom_angle_publ_flag 
C5 C4 C3 117.8(4) . . ? 
C5 C4 C9 121.0(4) . . ? 
C3 C4 C9 121.2(4) . . ? 
C1 C2 C3 117.8(4) . . ? 
C1 C2 C8 122.1(4) . . ? 
C3 C2 C8 120.1(4) . . ? 
C1 C6 C5 117.3(4) . . ? 
C1 C6 C7 121.6(5) . . ? 
C5 C6 C7 121.1(4) . . ? 
C4 C3 C2 121.8(4) . . ? 
C2 C1 C6 122.8(4) . . ? 
C2 C1 O1 121.2(4) . . ? 
C6 C1 O1 116.0(4) . . ? 
C4 C5 C6 122.6(4) . . ? 
C10 C9 C18 113.9(4) . . ? 
C10 C9 C4 112.7(3) . . ? 
C18 C9 C4 111.2(3) . . ? 
C23 C18 C19 116.8(4) . . ? 
C23 C18 C9 123.6(4) . . ? 
C19 C18 C9 119.6(4) . . ? 
C20 C19 C18 123.4(5) . . ? 
C21 C22 C23 117.9(5) . . ? 
C21 C22 C24 122.3(5) . . ? 
C23 C22 C24 119.8(5) . . ? 
C22 C21 C20 122.2(4) . . ? 
C22 C21 O2 120.7(5) . . ? 
C20 C21 O2 117.1(5) . . ? 
C19 C20 C21 117.6(5) . . ? 
C19 C20 C25 122.1(5) . . ? 
C21 C20 C25 120.3(4) . . ? 
C18 C23 C22 122.2(4) . . ? 
C15 C10 C11 115.8(4) . . ? 
C15 C10 C9 120.6(4) . . ? 
C11 C10 C9 123.5(4) . . ? 
N1 C13 C14 122.2(4) . . ? 
N1 C13 C12 120.5(4) . . ? 
C14 C13 C12 117.3(4) . . ? 
C15 C14 C13 120.5(4) . . ? 
C12 C11 C10 123.0(4) . . ? 
C11 C12 C13 120.5(4) . . ? 
C10 C15 C14 122.7(4) . . ? 
C13 N1 C17 120.8(4) . . ? 
C13 N1 C16 120.7(4) . . ? 
C17 N1 C16 118.3(5) . . ? 
C27 O3 C26 109.8(4) . . ? 
O3 C26 C27 111.0(5) . 2_775 ? 
O3 C27 C26 110.5(5) . 2_775 ? 
C28 O4 C29 109.4(6) . . ? 
O4 C28 C29 111.9(7) . 2_665 ? 
C28 C29 O4 108.7(8) 2_665 . ? 
 
_diffrn_measured_fraction_theta_max    0.985
_diffrn_reflns_theta_full              25.24 
_diffrn_measured_fraction_theta_full   0.985 
_refine_diff_density_max    0.452 
_refine_diff_density_min   -0.374 
_refine_diff_density_rms    0.077 
